# Supplementary material for: Incidence, Predictive Factors and Long-Term Clinical Impact of Left Ventricular Remodeling According to the Completeness of Revascularization in Patients with ST-Elevation Myocardial Infarction and Multivessel Disease
Source: MDPI journal article supplement (doi:10.3390/jcm11216252), 2022-10-23
Supplement: s1 [file s1]

## *Supplementary Material*

### Supplementary Figures

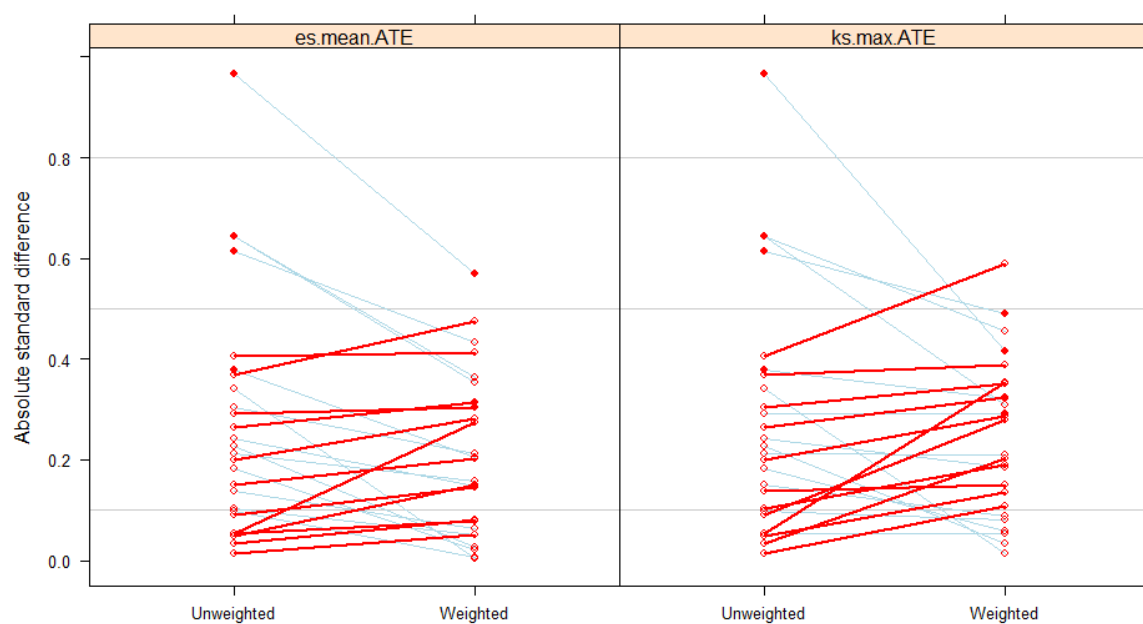

Figure S1. Standardized effect size plot for estimating propensity scores in all patients. ES=effect size; KS=Komogorov-Smirnov.

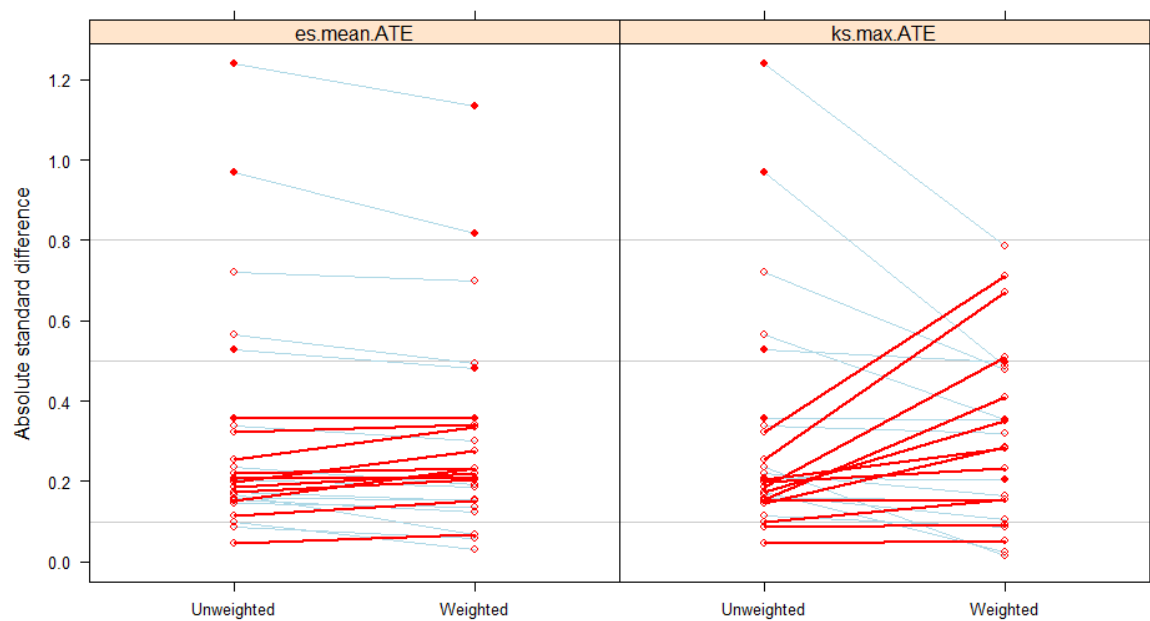

Figure S2. Standardized effect size plot for estimating propensity scores in patients with complete revascularization. ES=effect size; KS=Komogorov-Smirnov.

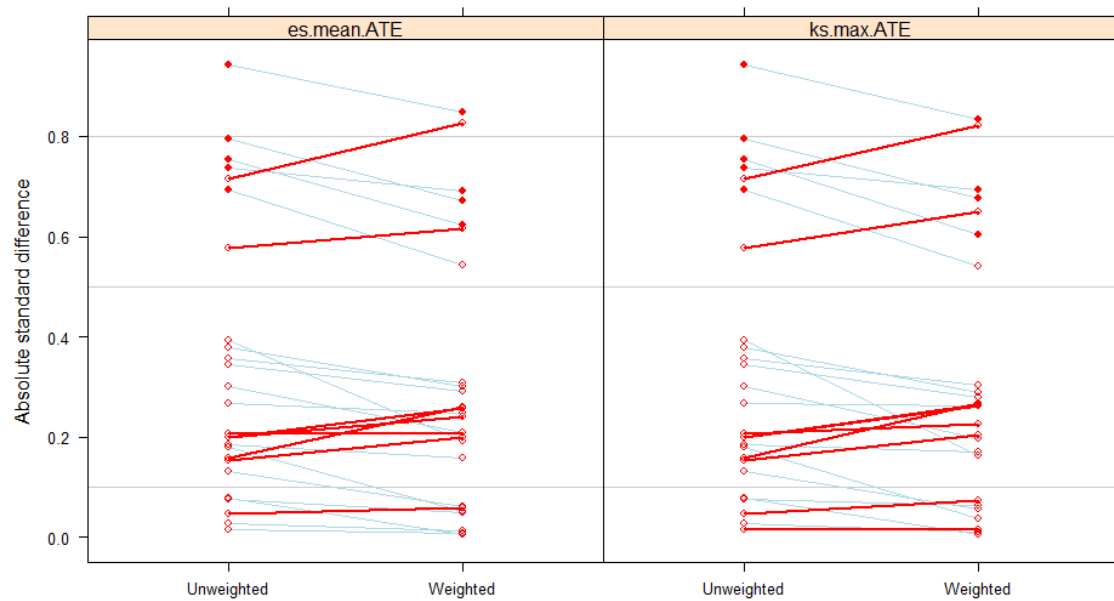

Figure S3. Standardized effect size plot for estimating propensity scores in patients with incomplete revascularization. ES=effect size; KS=Komogorov-Smirnov.

| Table S1. Comparison before and after IPTW adjustment for all patients |                        |        |                  |        |        |         |                       |        |                  |        |        |            |
|------------------------------------------------------------------------|------------------------|--------|------------------|--------|--------|---------|-----------------------|--------|------------------|--------|--------|------------|
|                                                                        | Before IPTW adjustment |        |                  |        |        |         | After IPTW adjustment |        |                  |        |        |            |
|                                                                        | LV remodeling          |        | No LV remodeling |        |        |         | LV remodeling         |        | No LV remodeling |        |        |            |
|                                                                        | Mean                   | SD     | Mean             | SD     | SES    | P value | Mean                  | SD     | Mean             | SD     | SES    | P value    |
| Age                                                                    | 71.5                   | 10.053 | 68.047           | 11.946 | 0.293  | 0.099   | 72.269                | 7.591  | 68.13            | 11.902 | 0.351  | 0.007      |
| Male                                                                   | 0.692                  | 0.471  | 0.733            | 0.443  | -0.091 | 0.669   | 0.536                 | 0.509  | 0.733            | 0.443  | -0.444 | 0.154      |
| SBP                                                                    | 130.38<br>5            | 23.406 | 134.91<br>5      | 22.493 | -0.201 | 0.34    | 132.52                | 20.729 | 134.85<br>2      | 22.507 | -0.103 | 0.671      |
| DBP                                                                    | 81.154                 | 13.365 | 83.898           | 12.918 | -0.212 | 0.312   | 83.208                | 11.078 | 83.858           | 12.877 | -0.05  | 0.781      |
| HR                                                                     | 78.692                 | 15.115 | 73.987           | 13.567 | 0.342  | 0.123   | 71.026                | 16.05  | 74.115           | 13.612 | -0.224 | 0.488      |
| Killip 2                                                               | 0.038                  | 0.196  | 0.123            | 0.329  | -0.265 | 0.053   | 0.017                 | 0.131  | 0.123            | 0.329  | -0.334 | <0.00<br>1 |
| Killip 3                                                               | 0.192                  | 0.402  | 0.042            | 0.202  | 0.644  | 0.057   | 0.107                 | 0.315  | 0.045            | 0.209  | 0.264  | 0.279      |

|                         |             |             |        |        |        |       |             |             |        |             |        |       |
|-------------------------|-------------|-------------|--------|--------|--------|-------|-------------|-------------|--------|-------------|--------|-------|
| Previous CAD            | 0.115       | 0.326       | 0.068  | 0.252  | 0.183  | 0.464 | 0.061       | 0.245       | 0.067  | 0.251       | -0.023 | 0.888 |
| Hypertension            | 0.423       | 0.504       | 0.475  | 0.5    | -0.103 | 0.615 | 0.628       | 0.493       | 0.475  | 0.5         | 0.307  | 0.197 |
| NT-proBNP (pg/mL)       | 0.423       | 0.504       | 0.284  | 0.452  | 0.304  | 0.171 | 0.386       | 0.497       | 0.284  | 0.452       | 0.223  | 0.432 |
| Smoking                 | 0.615       | 0.496       | 0.631  | 0.483  | -0.033 | 0.874 | 0.583       | 0.503       | 0.633  | 0.483       | -0.105 | 0.703 |
| Previous CVA            | 0.115       | 0.326       | 0.034  | 0.181  | 0.406  | 0.203 | 0.111       | 0.32        | 0.035  | 0.184       | 0.378  | 0.301 |
| Initial LVEF (%)        | 47.308      | 10.472      | 57.792 | 10.386 | -0.967 | 0     | 53.531      | 10.949      | 57.426 | 10.58       | -0.359 | 0.178 |
| Initial LVEDD (mm)      | 51.5        | 3.501       | 48.657 | 4.661  | 0.614  | 0     | 51.193      | 4.102       | 48.761 | 4.666       | 0.525  | 0.032 |
| Hemoglobin (mg/dL)      | 13.327      | 2.423       | 12.499 | 2.783  | 0.3    | 0.1   | 12.68       | 2.992       | 12.513 | 2.778       | 0.06   | 0.86  |
| Creatinine (mg/dL)      | 0.988       | 0.31        | 1.029  | 0.794  | -0.054 | 0.606 | 0.933       | 0.28        | 1.028  | 0.786       | -0.124 | 0.227 |
| CK-MB (ng/dL)           | 122.48<br>5 | 108.24<br>7 | 85.3   | 99.325 | 0.369  | 0.09  | 109.56<br>2 | 115.33<br>8 | 86.791 | 100.71<br>8 | 0.226  | 0.439 |
| Peak troponin I (mg/dL) | 94.758      | 91.357      | 54.726 | 56.913 | 0.644  | 0.027 | 71.561      | 73.568      | 55.833 | 58.26       | 0.253  | 0.28  |

## Supplementary Material

|                                      |             |             |             |             |        |       |             |             |             |             |        |       |
|--------------------------------------|-------------|-------------|-------------|-------------|--------|-------|-------------|-------------|-------------|-------------|--------|-------|
| NTproBNP                             | 461.84<br>6 | 331.99<br>8 | 316.19<br>5 | 275.84<br>7 | 0.512  | 0.029 | 390.65<br>5 | 339.06<br>9 | 319.84<br>7 | 277.25<br>8 | 0.249  | 0.454 |
| LDL cholesterol<br>(mg/dL)           | 122.84<br>6 | 28.59       | 126.49<br>2 | 37.461      | -0.099 | 0.546 | 131.81<br>5 | 26.684      | 126.53<br>5 | 37.265      | 0.144  | 0.461 |
| HDL cholesterol<br>(mg/dL)           | 41.346      | 9.798       | 46.462      | 13.791      | -0.378 | 0.015 | 43.771      | 10.268      | 46.35       | 13.752      | -0.191 | 0.321 |
| Hemoglobin A1C (%)                   | 6.812       | 1.634       | 6.478       | 1.127       | 0.281  | 0.304 | 6.45        | 1.411       | 6.478       | 1.12        | -0.024 | 0.918 |
| Statin at discharge                  | 0.769       | 0.43        | 0.852       | 0.356       | -0.227 | 0.338 | 0.856       | 0.358       | 0.853       | 0.355       | 0.008  | 0.968 |
| Beta-blocker at<br>discharge         | 0.846       | 0.368       | 0.89        | 0.314       | -0.137 | 0.554 | 0.885       | 0.326       | 0.891       | 0.312       | -0.021 | 0.921 |
| ACE inhibitor or<br>ARB at discharge | 0.808       | 0.402       | 0.788       | 0.409       | 0.048  | 0.811 | 0.845       | 0.37        | 0.785       | 0.412       | 0.147  | 0.484 |
| Three-vessel disease                 | 0.346       | 0.485       | 0.339       | 0.474       | 0.015  | 0.942 | 0.359       | 0.489       | 0.341       | 0.475       | 0.038  | 0.891 |

ACE=angiotensin converting enzyme; ARB=angiotensin receptor blocker; BNP=brain natriuretic peptide; CAD=coronary artery disease; CVA=cerebrovascular accident; DBP=diastolic blood pressure; HDL=high-density lipoprotein; HR=heart rate; IPTW=inverse probability

treatment weighting; LDL=low-density lipoprotein; LV=left ventricle; LVEDD=Left ventricular end-diastolic diameter; LVEF=Left ventricular ejection fraction; NT= N terminal; SES=standardized size effect; SD=standard deviation

| Table S2. Comparison before and after IPTW adjustment for the CR group |                        |        |                  |        |        |         |                       |        |                  |        |        |         |
|------------------------------------------------------------------------|------------------------|--------|------------------|--------|--------|---------|-----------------------|--------|------------------|--------|--------|---------|
|                                                                        | Before IPTW adjustment |        |                  |        |        |         | After IPTW adjustment |        |                  |        |        |         |
|                                                                        | LV remodeling          |        | No LV remodeling |        |        |         | LV remodeling         |        | No LV remodeling |        |        |         |
|                                                                        | Mean                   | SD     | Mean             | SD     | SES    | P value | Mean                  | SD     | Mean             | SD     | SES    | P value |
| Age                                                                    | 68.769                 | 10.043 | 66.391           | 11.705 | 0.206  | 0.409   | 68.532                | 9.843  | 66.387           | 11.713 | 0.186  | 0.449   |
| Male                                                                   | 0.692                  | 0.48   | 0.759            | 0.429  | -0.155 | 0.617   | 0.706                 | 0.474  | 0.76             | 0.429  | -0.124 | 0.69    |
| SBP                                                                    | 130.76<br>9            | 21.001 | 135.18<br>8      | 22.516 | -0.198 | 0.459   | 129.06<br>3           | 19.959 | 135.24<br>4      | 22.531 | -0.277 | 0.262   |
| DBP                                                                    | 80.769                 | 10.377 | 83.684           | 13.454 | -0.221 | 0.334   | 80.637                | 10.173 | 83.713           | 13.486 | -0.233 | 0.302   |
| HR                                                                     | 70.923                 | 12.1   | 73.218           | 12.379 | -0.186 | 0.502   | 70.509                | 12.931 | 73.211           | 12.343 | -0.219 | 0.494   |
| Killip 3                                                               | 0.154                  | 0.376  | 0.023            | 0.149  | 0.719  | 0.197   | 0.15                  | 0.371  | 0.022            | 0.147  | 0.699  | 0.207   |
| Hypertension                                                           | 0.538                  | 0.519  | 0.451            | 0.499  | 0.175  | 0.549   | 0.55                  | 0.518  | 0.448            | 0.499  | 0.205  | 0.492   |



|                            |             |             |             |             |        |       |             |             |             |             |        |       |
|----------------------------|-------------|-------------|-------------|-------------|--------|-------|-------------|-------------|-------------|-------------|--------|-------|
| NT-proBNP (pg/mL)          | 0.231       | 0.439       | 0.308       | 0.464       | -0.168 | 0.533 | 0.276       | 0.465       | 0.306       | 0.463       | -0.066 | 0.83  |
| Smoking                    | 0.615       | 0.506       | 0.662       | 0.475       | -0.097 | 0.744 | 0.646       | 0.498       | 0.662       | 0.475       | -0.032 | 0.915 |
| LVEF initial (%)           | 48.692      | 10.078      | 58.429      | 9.66        | -0.968 | 0.001 | 49.918      | 10.294      | 58.142      | 9.797       | -0.818 | 0.007 |
| Initial LVEDD (mm)         | 51.154      | 2.911       | 48.955      | 4.233       | 0.527  | 0.012 | 51.017      | 2.847       | 49.005      | 4.234       | 0.482  | 0.019 |
| Hemoglobin (mg/dL)         | 11.946      | 2.883       | 12.659      | 2.804       | -0.254 | 0.379 | 11.702      | 2.971       | 12.642      | 2.81        | -0.335 | 0.285 |
| Creatinine (mg/dL)         | 0.969       | 0.315       | 0.919       | 0.339       | 0.15   | 0.572 | 0.996       | 0.331       | 0.917       | 0.337       | 0.233  | 0.426 |
| CK-MB (ng/dL)              | 140.26<br>9 | 117.84<br>1 | 84.732      | 95.008      | 0.566  | 0.09  | 135.88<br>8 | 119.3       | 87.378      | 98.928      | 0.495  | 0.157 |
| Peak troponin I<br>(mg/dL) | 124.76<br>8 | 110.57<br>8 | 50.904      | 48.035      | 1.238  | 0.015 | 120.25<br>4 | 111.37<br>6 | 52.592      | 50.138      | 1.134  | 0.032 |
| NTproBNP                   | 351.15<br>4 | 324.4       | 263.88<br>7 | 263.44<br>9 | 0.324  | 0.332 | 355.82<br>2 | 330.27<br>1 | 264.15<br>7 | 263.46<br>7 | 0.34   | 0.338 |
| LDL cholesterol<br>(mg/dL) | 134.23<br>1 | 29.598      | 128.63<br>2 | 39.029      | 0.146  | 0.516 | 133.71<br>8 | 29.954      | 128.54<br>8 | 38.935      | 0.135  | 0.565 |

## Supplementary Material

|                                   |        |       |        |        |        |       |        |        |        |        |        |       |
|-----------------------------------|--------|-------|--------|--------|--------|-------|--------|--------|--------|--------|--------|-------|
| HDL cholesterol (mg/dL)           | 45.769 | 9.782 | 47.474 | 15.462 | -0.113 | 0.563 | 45.111 | 10.353 | 47.375 | 15.456 | -0.151 | 0.491 |
| Hemoglobin A1C (%)                | 6.192  | 1.023 | 6.62   | 1.286  | -0.338 | 0.15  | 6.233  | 1.089  | 6.613  | 1.281  | -0.3   | 0.264 |
| Statin at discharge               | 0.769  | 0.439 | 0.835  | 0.373  | -0.173 | 0.592 | 0.777  | 0.433  | 0.834  | 0.374  | -0.151 | 0.644 |
| Beta-blocker at discharge         | 0.923  | 0.277 | 0.91   | 0.288  | 0.047  | 0.865 | 0.891  | 0.325  | 0.91   | 0.287  | -0.069 | 0.851 |
| ACE inhibitor or ARB at discharge | 0.846  | 0.376 | 0.812  | 0.392  | 0.088  | 0.748 | 0.829  | 0.392  | 0.807  | 0.396  | 0.058  | 0.85  |
| Three-vessel disease              | 0.154  | 0.376 | 0.256  | 0.438  | -0.235 | 0.345 | 0.171  | 0.392  | 0.254  | 0.437  | -0.191 | 0.49  |

ACE=angiotensin converting enzyme; ARB=angiotensin receptor blocker; BNP=brain natriuretic peptide; CAD=coronary artery disease; CVA=cerebrovascular accident; DBP=diastolic blood pressure; HDL=high-density lipoprotein; HR=heart rate; IPTW=inverse probability treatment weighting; LDL=low-density lipoprotein; LV=left ventricle; LVEDD=Left ventricular end-diastolic diameter; LVEF=Left ventricular ejection fraction; NT= N terminal; SES=standardized size effect; SD=standard deviation

| Table S3. Comparison before and after IPTW adjustment for the IR group |                        |        |                  |        |        |         |                       |        |                  |        |        |         |
|------------------------------------------------------------------------|------------------------|--------|------------------|--------|--------|---------|-----------------------|--------|------------------|--------|--------|---------|
|                                                                        | Before IPTW adjustment |        |                  |        |        |         | After IPTW adjustment |        |                  |        |        |         |
|                                                                        | LV remodeling          |        | No LV remodeling |        |        |         | LV remodeling         |        | No LV remodeling |        |        |         |
|                                                                        | Mean                   | SD     | Mean             | SD     | SES    | P value | Mean                  | SD     | Mean             | SD     | SES    | P value |
| Age                                                                    | 74.231                 | 9.671  | 70.184           | 11.97  | 0.344  | 0.158   | 73.639                | 8.788  | 70.208           | 11.885 | 0.292  | 0.171   |
| Male                                                                   | 0.692                  | 0.48   | 0.699            | 0.461  | -0.015 | 0.961   | 0.697                 | 0.478  | 0.701            | 0.46   | -0.008 | 0.978   |
| SBP                                                                    | 130                    | 26.458 | 134.563          | 22.569 | -0.199 | 0.54    | 129.161               | 24.224 | 134.703          | 22.631 | -0.241 | 0.401   |
| DBP                                                                    | 81.538                 | 16.251 | 84.175           | 12.249 | -0.208 | 0.56    | 81.607                | 15.699 | 84.254           | 12.271 | -0.208 | 0.554   |
| HR                                                                     | 86.462                 | 14.099 | 74.981           | 14.967 | 0.753  | 0.005   | 84.805                | 14.214 | 75.29            | 15.221 | 0.624  | 0.025   |
| Killip 2                                                               | 0.077                  | 0.277  | 0.146            | 0.354  | -0.198 | 0.404   | 0.057                 | 0.241  | 0.146            | 0.355  | -0.258 | 0.181   |
| Killip 3                                                               | 0.231                  | 0.439  | 0.068            | 0.253  | 0.578  | 0.177   | 0.243                 | 0.446  | 0.07             | 0.256  | 0.615  | 0.181   |

## Supplementary Material

|                    |             |             |             |             |            |       |             |             |             |             |        |           |
|--------------------|-------------|-------------|-------------|-------------|------------|-------|-------------|-------------|-------------|-------------|--------|-----------|
| Previous CAD       | 0.231       | 0.439       | 0.107       | 0.31        | 0.379      | 0.309 | 0.206       | 0.421       | 0.108       | 0.312       | 0.3    | 0.39<br>3 |
| Hypertension       | 0.308       | 0.48        | 0.505       | 0.502       | -<br>0.393 | 0.155 | 0.409       | 0.512       | 0.506       | 0.502       | -0.192 | 0.54<br>2 |
| NT-proBNP (pg/mL)  | 401.30<br>8 | 398.75<br>5 | 360.61<br>2 | 296.97<br>2 | 0.132      | 0.714 | 376.87<br>6 | 380.81<br>5 | 357.82<br>8 | 297.15<br>4 | 0.062  | 0.85<br>6 |
| Smoking            | 0.615       | 0.506       | 0.592       | 0.494       | 0.047      | 0.873 | 0.565       | 0.516       | 0.594       | 0.494       | -0.059 | 0.85<br>2 |
| Previous CVA       | 0.231       | 0.439       | 0.049       | 0.216       | 0.716      | 0.129 | 0.259       | 0.456       | 0.049       | 0.216       | 0.827  | 0.12<br>7 |
| LVEF initial (%)   | 45.923      | 11.079      | 56.971      | 11.25       | -<br>0.943 | 0.001 | 46.765      | 10.663      | 56.716      | 11.387      | -0.849 | 0.00<br>1 |
| Initial LVEDD (mm) | 51.846      | 4.1         | 48.272      | 5.157       | 0.693      | 0.004 | 51.167      | 4.968       | 48.362      | 5.166       | 0.544  | 0.10<br>8 |
| Hemoglobin (mg/dL) | 12.962      | 2.686       | 12.525      | 2.763       | 0.159      | 0.571 | 13.233      | 2.592       | 12.52       | 2.754       | 0.259  | 0.33<br>5 |
| Creatinine (mg/dL) | 1.008       | 0.317       | 1.172       | 1.127       | -<br>0.154 | 0.243 | 0.956       | 0.299       | 1.168       | 1.111       | -0.199 | 0.11<br>4 |
| CK-MB (ng/dL)      | 104.7       | 99.194      | 86.035      | 105.10<br>3 | 0.179      | 0.514 | 92.196      | 91.466      | 86.76       | 105.58      | 0.052  | 0.83      |

[illegible]

treatment weighting; LDL=low-density lipoprotein; LV=left ventricle; LVEDD=Left ventricular end-diastolic diameter; LVEF=Left ventricular ejection fraction; NT= N terminal; SES=standardized size effect; SD=standard deviation
